# Supplementary material for: Localized crystallization: a chemical transformation of Nb2O5 rod-like arrays into ordered niobate arrays
Source: Royal Society of Chemistry journal article supplement (doi:10.1039/c0ce00449a), 2010-12-22
Supplement: c0ce00449a.pdf [file c0ce00449a.pdf]

## **Electronic Supplementary Information (ESI)**

### **Localized Crystallization: A Chemical Transformation of Nb<sub>2</sub>O<sub>5</sub> Rod-Like Arrays into Ordered Niobate Arrays**

Junshu Wu and Dongfeng Xue\*

State Key Lab of Fine Chemicals, Department of Materials Science and Chemical  
Engineering, School of Chemical Engineering, Dalian University of Technology,

Dalian 116012, China

\*Corresponding author: [dfxue@dlut.edu.cn](mailto:dfxue@dlut.edu.cn)

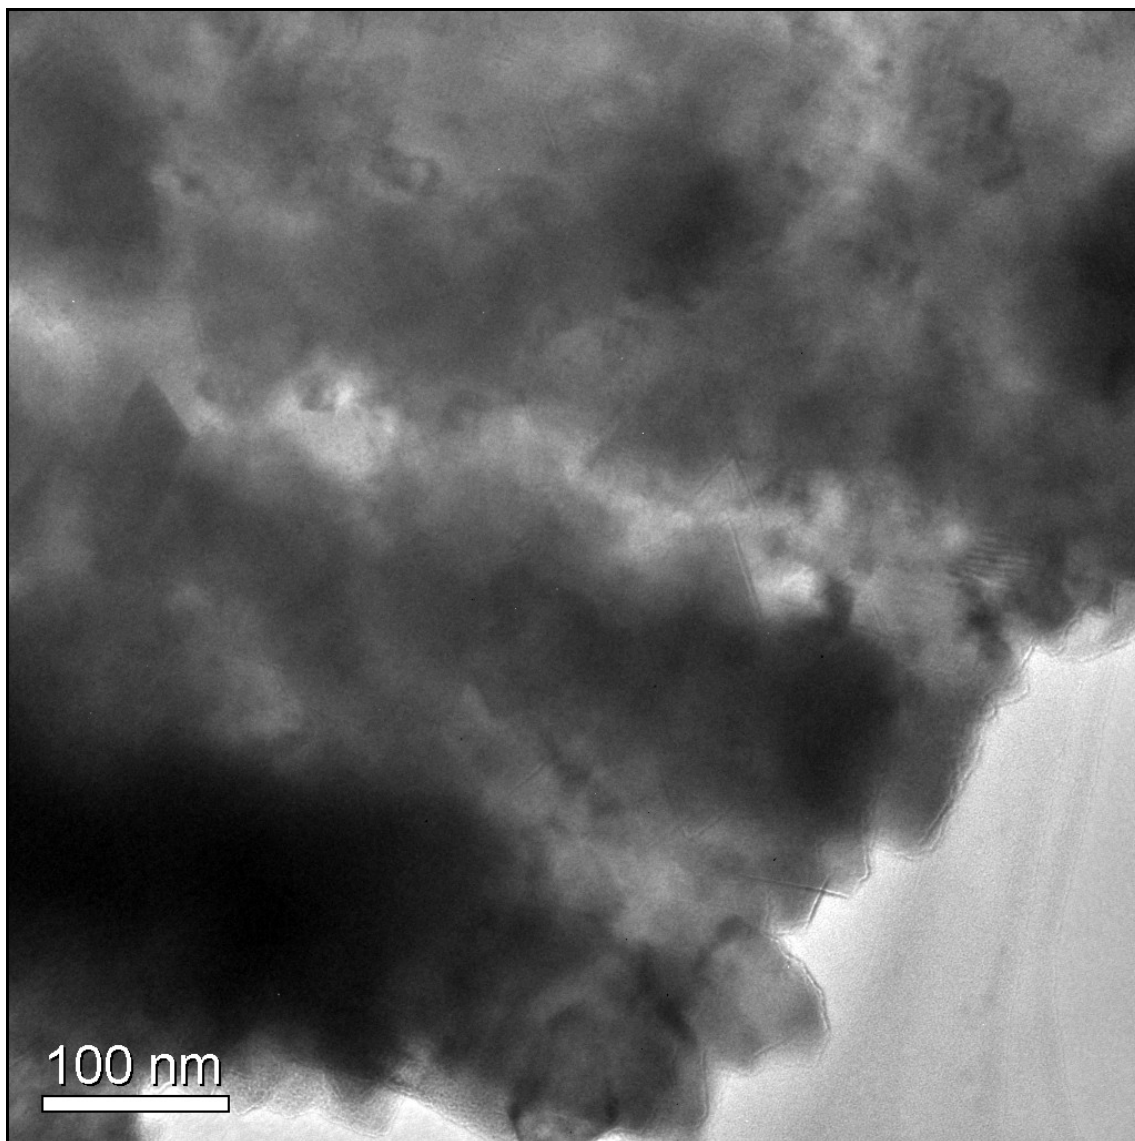

**Fig. S1.** TEM image of a NaNb<sub>3</sub>O<sub>8</sub> microtube showing that the wall is porous.

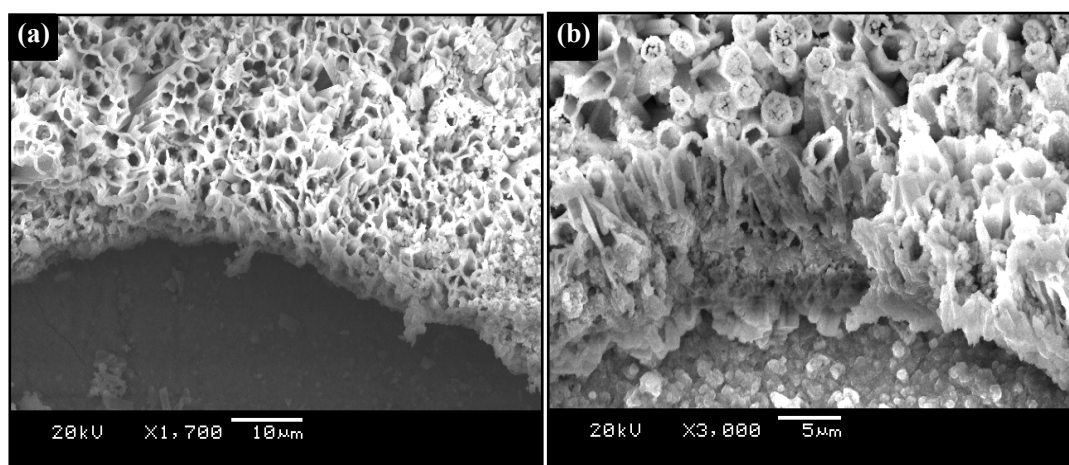

**Fig. S2.** The side view of  $\text{NaNb}_3\text{O}_8$  microtubes without (a) and with (b) top caps.

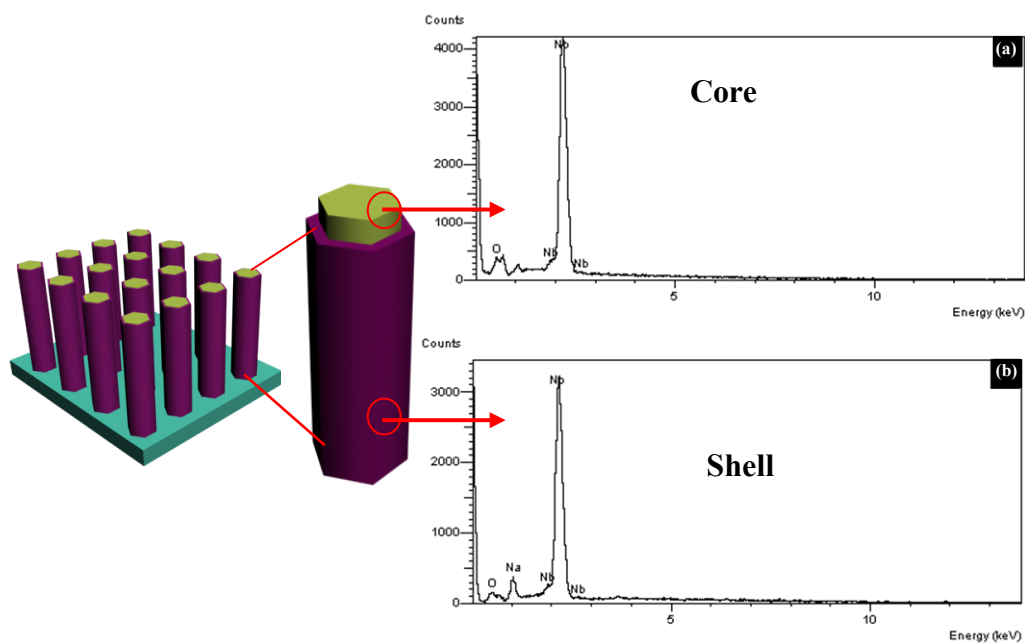

**Fig. S3.** EDX spectra of the core/shell structures emphasizing the compositional difference of  $\text{Nb}_2\text{O}_5$  core (a) and  $\text{NaNb}_3\text{O}_8$  shell (b).

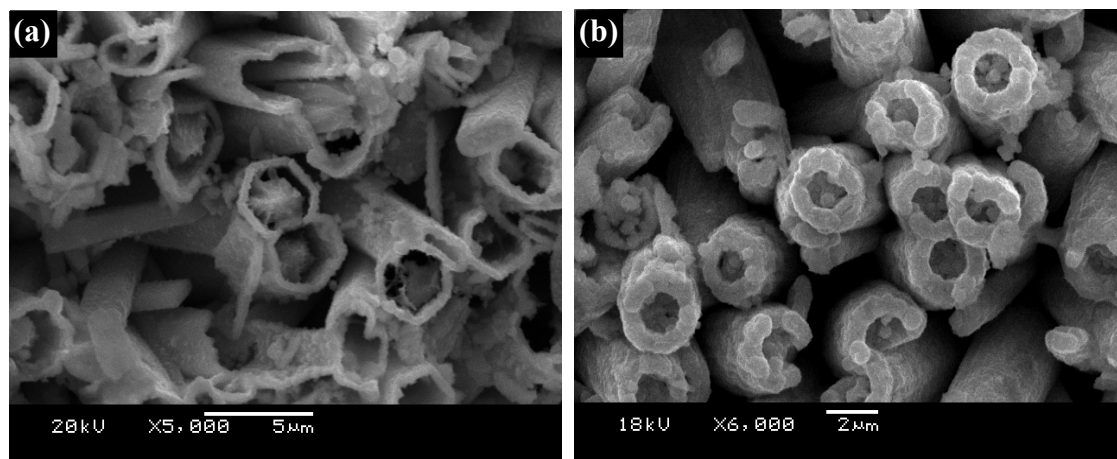

**Fig. S4.** (a) Quick dissolution process results in poor structural strength of the thin shells collapse. (b) Slow dissolution process renders the growth of  $\text{NaNb}_3\text{O}_8$  in nanoscale voids and the shells become thick, restraining hollowing process. The  $\text{NH}_4\text{F}$  concentration was a) 1.8 M and b) 1.0 M.

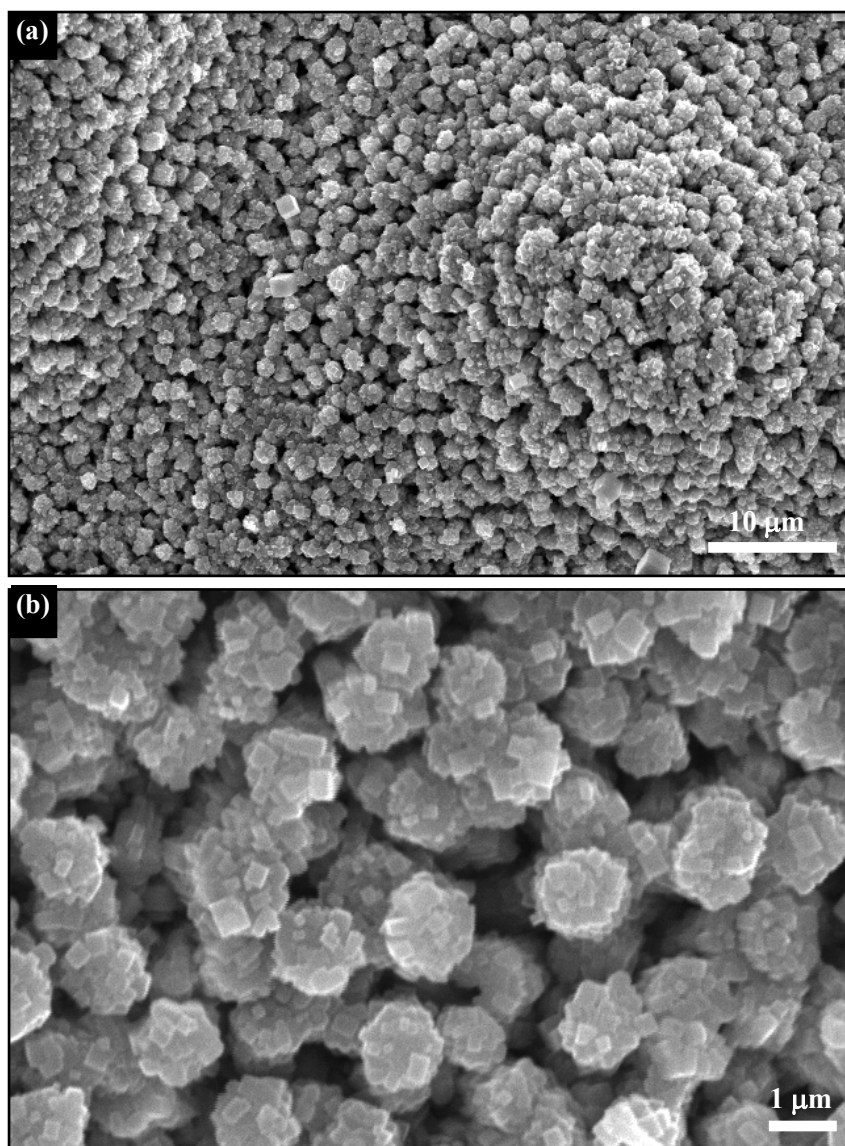

**Fig. S5.** SEM images of sodium niobate thin film produced without the addition of  $\text{NH}_4\text{F}$ .



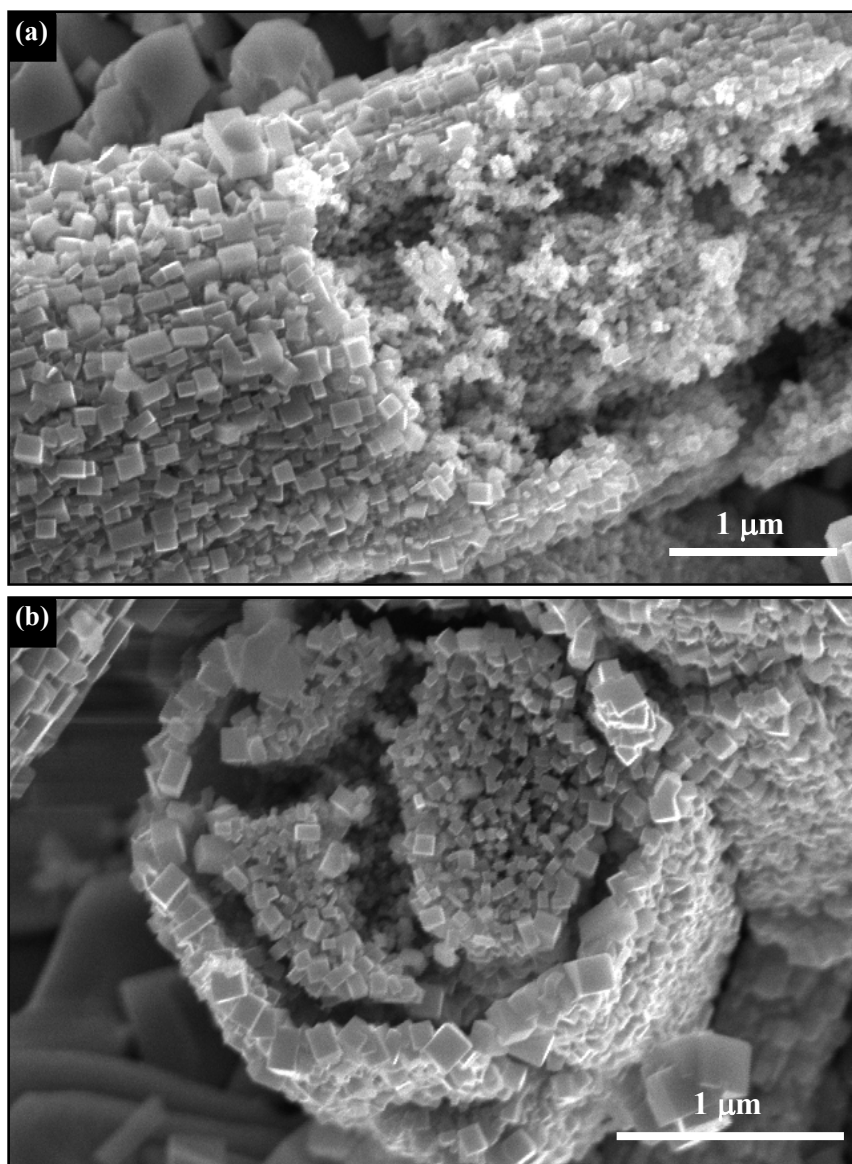

**Fig. S6.** SEM images of broken NaNbO<sub>3</sub> hierarchical microrods from A-Sample

Nb<sub>2</sub>O<sub>5</sub>.

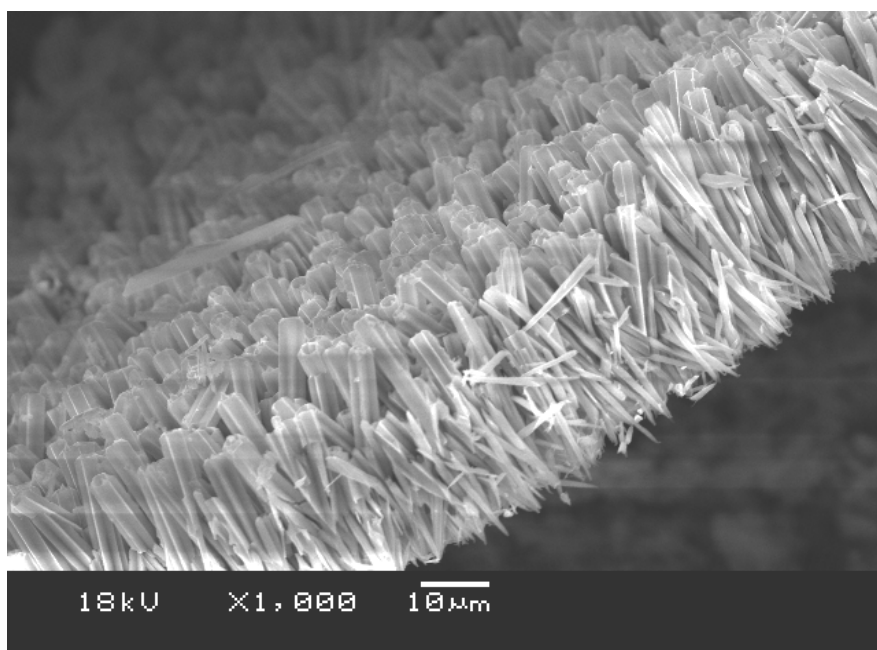

**Fig. S7.** A cross section image of the free-standing KNMT thin film.



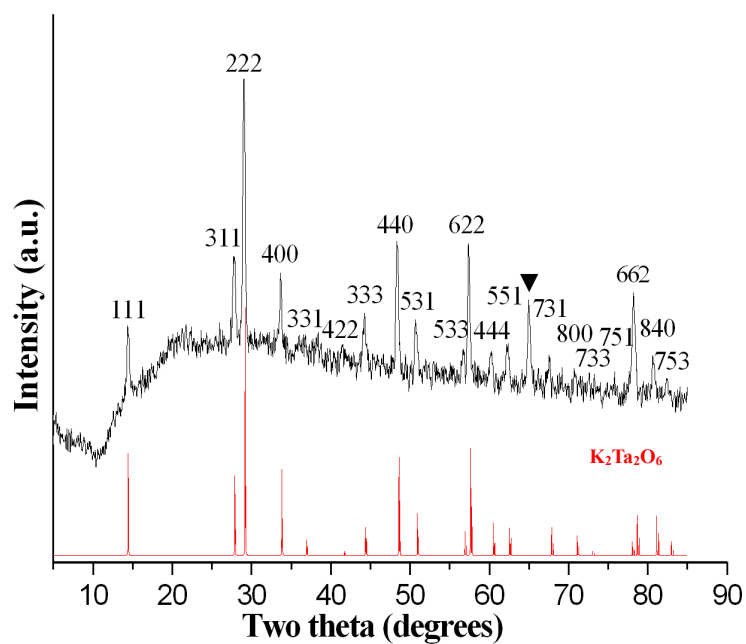

**Fig. S8.** XRD pattern of the as-obtained KNMT arrays showing that it is completely identical to  $K_2Ta_2O_6$  (JCPDS Card No. 35-1464), which indicating the resemblance of the crystal structure. The peaks labeled with black triangles correspond to the diffraction peak of Nb substrate.

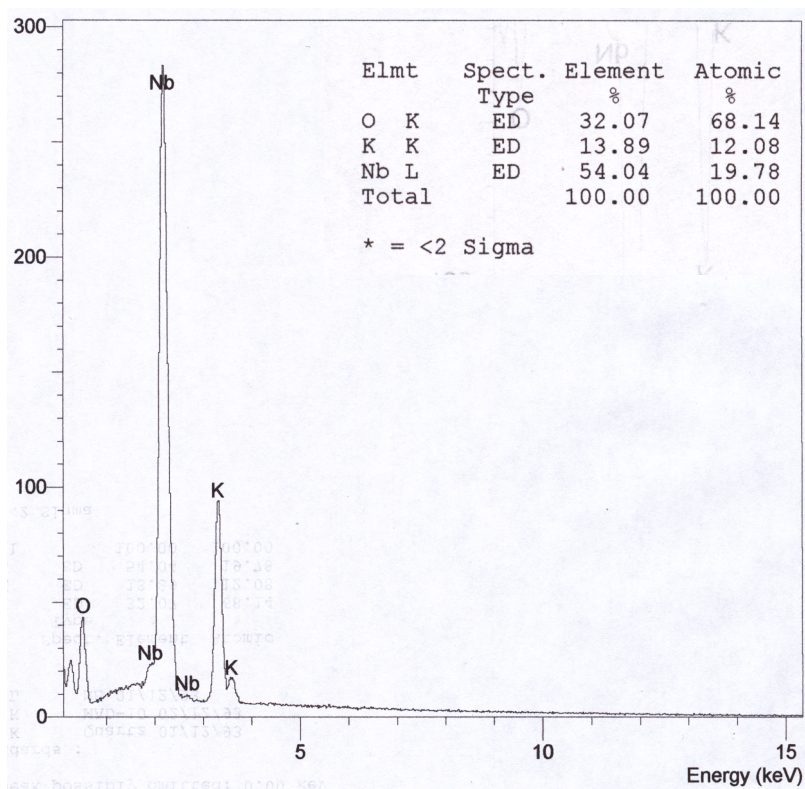

**Fig. S9.** EDX pattern for the as-obtained KNMT.

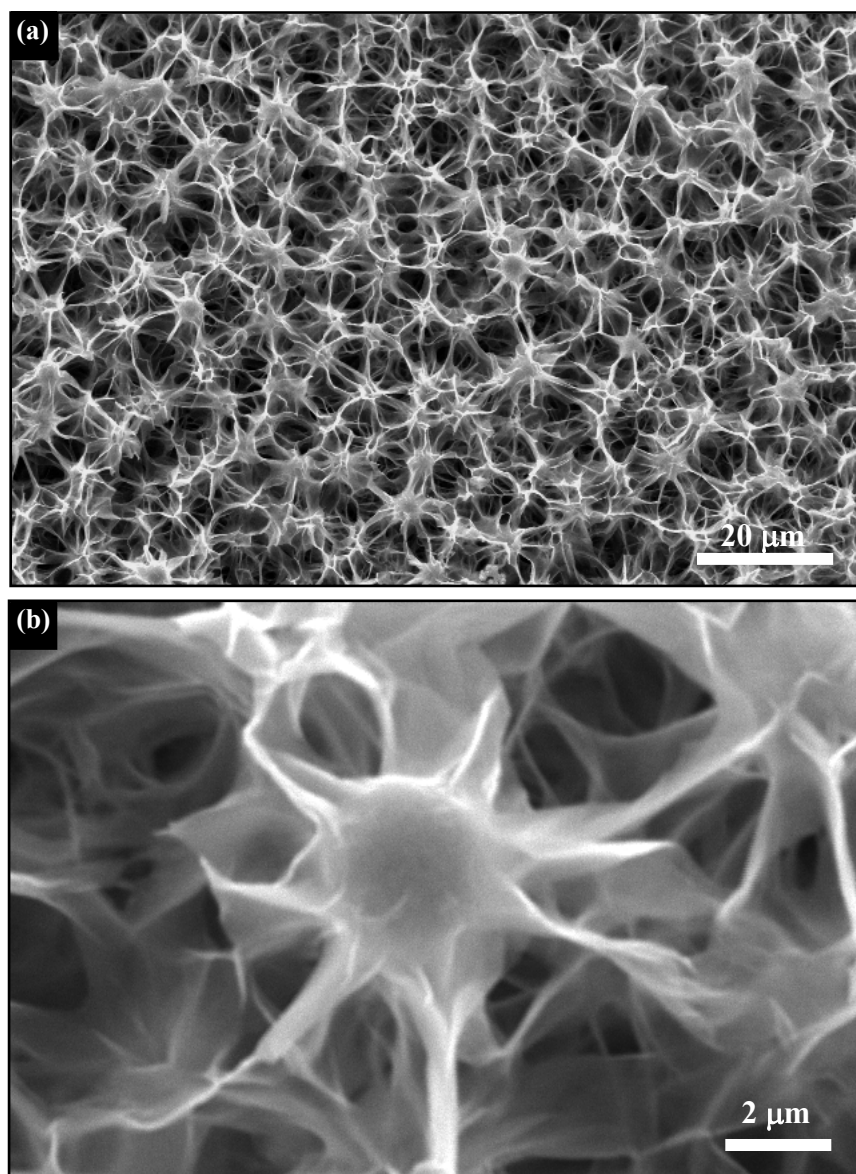

**Fig. S10.** SEM images of potassium niobate thin film produced at lower KOH concentration (0.15–0.25 M) with other reaction conditions unchanged.
